# Supplementary material
Source: publisher site journal article supplement (https://www.dovepress.com/article/369657)
Supplement: Supplementary file 1 [file get_supplementary_file.php]

## **Supplementary materials**

### **Supplementary Table 1** Definitions of the perioperative cardiac

complications.

| <b>PPCs</b>                 | <b>Definition</b>                                                                                                                                                                                                                                                                                                                                                                                                                                                                                                                                      |
|-----------------------------|--------------------------------------------------------------------------------------------------------------------------------------------------------------------------------------------------------------------------------------------------------------------------------------------------------------------------------------------------------------------------------------------------------------------------------------------------------------------------------------------------------------------------------------------------------|
| ACS                         | ACS comprised STEMI and NSTEMI-ACS. A diagnosis of MI required a cTnI level increase of above the 99th percentile, accompanied by chest pain, ST-segment changes or new-onset left bundle branch block, ventricular wall motion abnormalities, or angiography confirmation. NSTEMI-ACS could be further subdivided into non-ST-elevation MI and unstable angina based on the cardiac biomarkers.                                                                                                                                                       |
| HF                          | Active clinical symptoms or physical examination findings of dyspnea, orthopnea, peripheral edema, jugular venous distention, rales, third heart sound, or chest X-ray with pulmonary vascular redistribution or pulmonary edema.                                                                                                                                                                                                                                                                                                                      |
| New-onset severe arrhythmia | Electrocardiographic changes requiring treatment with drugs or electrical conversion, namely malignant ventricular arrhythmia (ventricular tachycardia or ventricular fibrillation), atrial flutter or atrial fibrillation, atrioventricular block (second-degree type II or third-degree), PSVT, or frequent ventricular premature contractions (defined as the presence of seven or more ventricular premature beats per minute during any given stage, ventricular bigeminy, ventricular trigeminy, ventricular couplets, or ventricular triplets). |
| Cardiac arrest              | Loss of circulation prompting resuscitation requiring chest compressions, defibrillation, or both.                                                                                                                                                                                                                                                                                                                                                                                                                                                     |
| Cardiac death               | Death with known fatal cardiac conditions, autopsy identified cardiac or vascular anomaly, or any death for which no obvious extracardiac cause could be established.                                                                                                                                                                                                                                                                                                                                                                                  |

**Abbreviations:** ACS, acute coronary syndrome; cTnI, cardiac troponin I; HF, heart failure; MI, myocardial infarction; NSTEMI-ACS, non-ST-elevation acute coronary syndrome; PPCs, perioperative cardiac complications; PSVT, paroxysmal supraventricular tachycardia; STEMI, ST-elevation myocardial infarction.

**Supplementary Figure 1** Calibration plots for the RCRI prediction model.

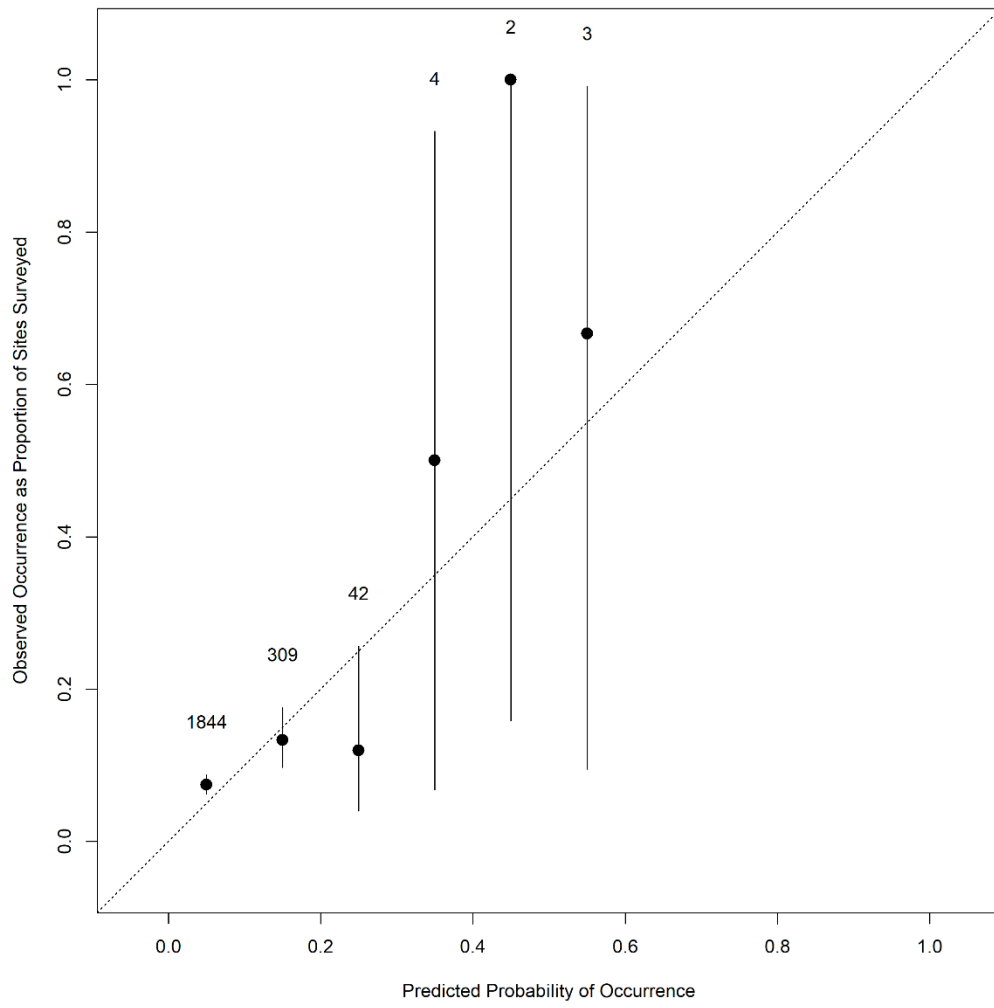

**Abbreviations:** RCRI, revised cardiac risk index.

**Supplementary Figure 2** Calibration plots for the clinical prediction model.

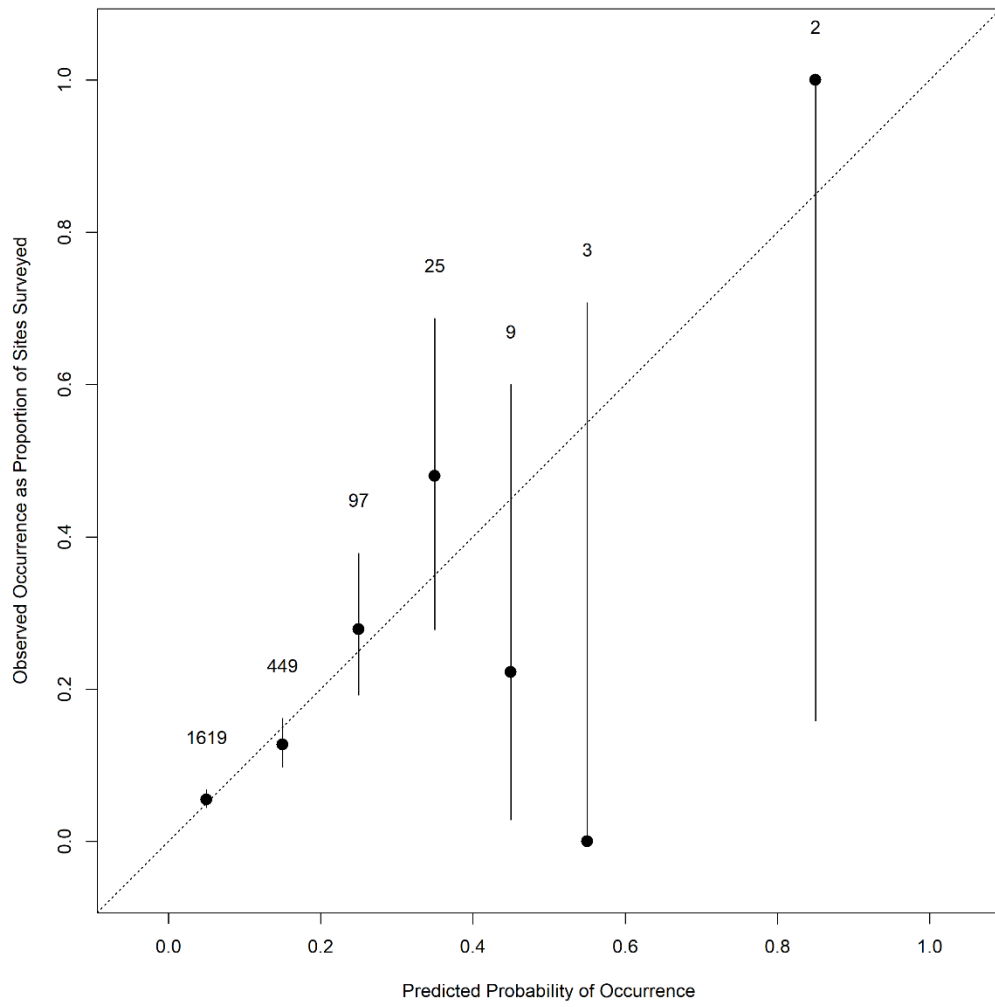

**Supplementary Figure 3** Calibration plots for the clinical plus TTE prediction model.

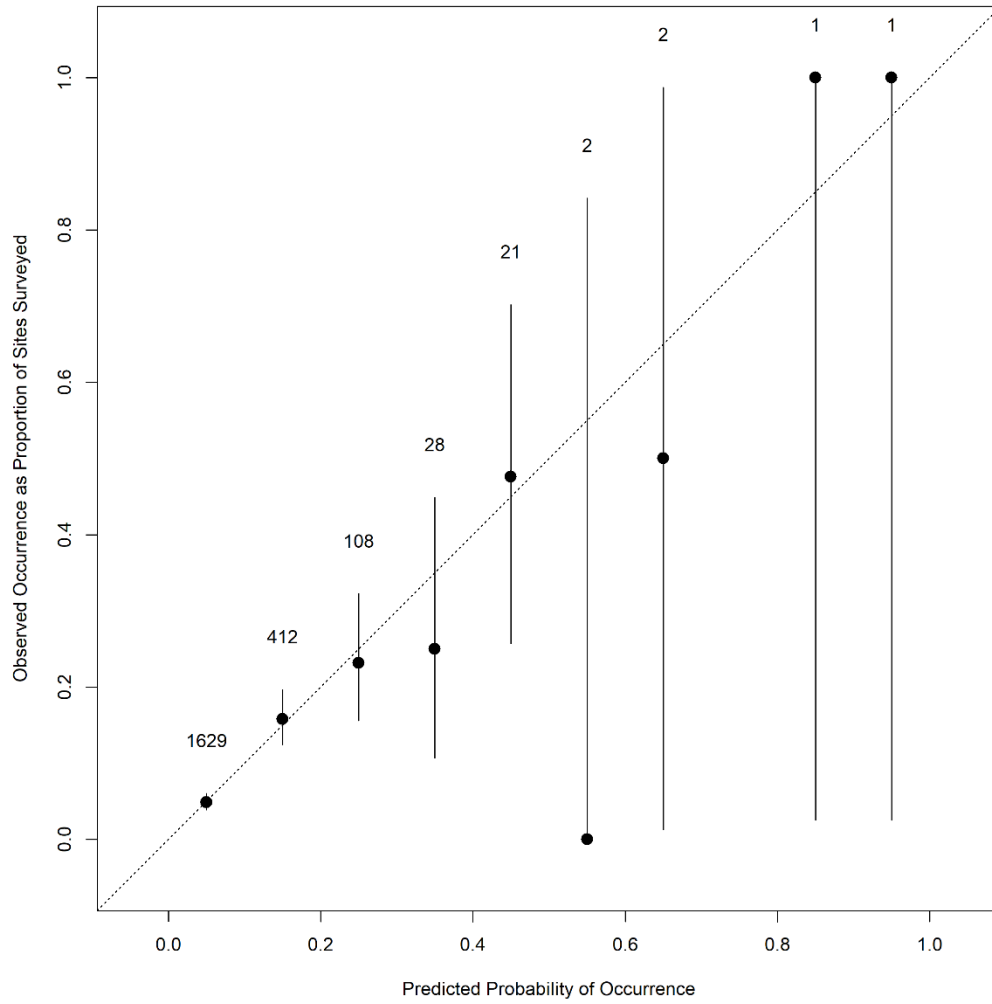

**Abbreviation:** TTE, transthoracic echocardiography.
